# Supplementary material for: Unexpected electronic perturbation effects of simple PEG environments on the optical properties of small cadmium chalcogenide clusters
Source: Royal Society of Chemistry journal article supplement (doi:10.1039/c5nr06307h), 2015-01-01
Supplement: c5nr06307h1.pdf [file c5nr06307h1.pdf]

SUPPORTING INFORMATION

**Unexpected electronic perturbation effects of simple PEG environments on the optical properties of small cadmium chalcogenide clusters**

Naoto Fukunaga<sup>a</sup> and Katsuaki Konishi<sup>\*ab</sup>

<sup>a</sup>Graduate School of Environmental Science and <sup>b</sup>Faculty of Environmental Earth Science, Hokkaido University, North 10 West 5, Sapporo 060-0810 Japan.

**Syntheses of PEGylated thiols**

Thiol-terminated PEGs (HS-PEG<sub>n</sub>) for **1**-PEG<sub>n</sub> were prepared from tri(ethylene glycol) monomethyl ether ( $n = 3$ ) and poly(ethylene glycol) monomethyl ethers ( $n = \sim 7, \sim 17$  and  $\sim 46$  for  $M_w = 350, 750$  and  $2000$ , respectively). HS-(CH<sub>2</sub>)<sub>*m*</sub>-CONH-PEG17 for **2**-C<sub>*m*</sub>-PEG17 ( $m = 2, 3, 7, 10$ ) were prepared from amino-terminated poly(ethylene glycol) monomethyl ethers with  $M_w$  of 750. HS-(CH<sub>2</sub>)<sub>11</sub>-(OCH<sub>2</sub>CH<sub>2</sub>)<sub>*n*</sub>OCH<sub>3</sub> ( $n = \sim 17$ ) for **3** was prepared according to a literature method reported for analogous compounds (N. Bonnet, D. O'Hagan and G. Hähner, *Chem. Commun.*, 2007, **47**, 5066-5068). The outline of the synthetic routes is shown in Schemes S1.

TsO(CH<sub>2</sub>CH<sub>2</sub>O)<sub>3</sub>CH<sub>3</sub> (**TsO-PEG3**): To a mixture of *p*-toluenesulfonyl chloride (34.9 g, 183.1 mmol) and triethylamine (46.1 ml, 304.9 mmol) dissolved in dichloromethane (50 ml) was added slowly tri(ethylene glycol) monomethyl ether (10.0 g, 60.9 mmol) at 0 °C, and the resultant solution was stirred at room temperature under N<sub>2</sub> for 24 h. Aq. HCl (1.0 M) was added to the reaction mixture and the separated organic layer was successively washed with aq. NaHCO<sub>3</sub> and then with water, dried over MgSO<sub>4</sub>, and filtered. The filtrate was evaporated and the residue was subjected to silica gel column chromatography (Silica Gel 60 N; Kanto Chemical) with dichloromethane / methanol (20 / 1 v/v) as eluent to give TsO-PEG3 as yellow oil (33.6 g, 94 %). <sup>1</sup>H NMR (400 MHz, CDCl<sub>3</sub>): δ 7.80 (d, 2H, Ar-H), 7.32 (d, 2H, Ar-H), 4.16 (t, 2H, -CH<sub>2</sub>-O-Ts), 3.90-3.40 (m, 10H, O-CH<sub>2</sub>-CH<sub>2</sub>-O), 3.36 (s, 3H, O-CH<sub>3</sub>), 2.45 (s, 3H, Ar-CH<sub>3</sub>).

TsO(CH<sub>2</sub>CH<sub>2</sub>O)<sub>*n*</sub>CH<sub>3</sub> ( $n = \sim 7$  (**TsO-PEG7**),  $n = \sim 17$  (**TsO-PEG17**),  $n = \sim 46$  (**TsO-PEG46**)) were prepared in similar manners to that described for the synthesis of TsO-PEG3.

**TsO-PEG7**: <sup>1</sup>H NMR: δ 7.80 (d, 2H, Ar-H), 7.33 (d, 2H, Ar-H), 4.15 (t, 2H, -CH<sub>2</sub>-O-Ts), 3.90-3.40 (m, 26H, O-CH<sub>2</sub>-CH<sub>2</sub>-O), 3.37 (s, 3H, O-CH<sub>3</sub>), 2.44 (s, 3H, Ar-CH<sub>3</sub>).

**TsO-PEG17**: <sup>1</sup>H NMR: δ 7.79 (d, 2H, Ar-H), 7.33 (d, 2H, Ar-H), 4.14 (t, 2H, -CH<sub>2</sub>-O-Ts), 3.90-3.40 (m, 66H, O-CH<sub>2</sub>-CH<sub>2</sub>-O), 3.37 (s, 3H, O-CH<sub>3</sub>), 2.44 (s, 3H, Ar-CH<sub>3</sub>).

**TsO-PEG46**: <sup>1</sup>H NMR: δ 7.80 (d, 2H, Ar-H), 7.34 (d, 2H, Ar-H), 4.15 (t, 2H, -CH<sub>2</sub>-O-Ts), 3.90-3.40 (m, 182H, O-CH<sub>2</sub>-CH<sub>2</sub>-O), 3.37 (s, 3H, O-CH<sub>3</sub>), 2.45 (s, 3H, Ar-CH<sub>3</sub>).

HS-(CH<sub>2</sub>CH<sub>2</sub>O)<sub>3</sub>CH<sub>3</sub> (**HS-PEG3**): To a solution of TsO-PEG3 (4.20 g, 13.1 mmol) in ethanol (30 ml) was added thiourea (1.31 g, 17.2 mmol), and the resultant solution was refluxed under N<sub>2</sub> for 18 h. After cooled to room temperature, the reaction mixture was mixed with sodium hydroxide (0.94 g, 23.6 mmol), and then was refluxed again under N<sub>2</sub> for 5 h. After the removal of the solvents in vacuo, the residue was treated with aq. HCl (1.0 M) and the pH was adjusted

2~3. The resultant suspension was extracted with dichloromethane, and the organic layer was separated, dried over Na<sub>2</sub>SO<sub>4</sub>, and filtered. Evaporation of the filtrate gave **HS-PEG3** as transparent oil (2.09 g, 97 %). <sup>1</sup>H NMR: δ 3.90-3.40 (m, 10H, O-CH<sub>2</sub>-CH<sub>2</sub>-O), 3.38 (s, 3H, O-CH<sub>3</sub>), 2.70 (q, 2H, S-CH<sub>2</sub>).

HS(CH<sub>2</sub>CH<sub>2</sub>O)<sub>n</sub>CH<sub>3</sub> (*n* = ~7 (**HS-PEG7**), *n* = ~17 (**HS-PEG17**), *n* = ~17 (**HS-PEG46**)) were prepared in similar manners to that described for the synthesis of **HS-PEG3**.

**HS-PEG7**: <sup>1</sup>H NMR: δ 3.90-3.40 (m, 26H, O-CH<sub>2</sub>-CH<sub>2</sub>-O), 3.38 (s, 3H, O-CH<sub>3</sub>), 2.73 (q, 2H, S-CH<sub>2</sub>).

**HS-PEG17**: <sup>1</sup>H NMR: δ 3.90-3.40 (m, 66H, O-CH<sub>2</sub>-CH<sub>2</sub>-O), 3.38 (s, 3H, O-CH<sub>3</sub>), 2.70 (q, 2H, S-CH<sub>2</sub>).

**HS-PEG46**: <sup>1</sup>H NMR: δ 3.90-3.40 (m, 184H, O-CH<sub>2</sub>-CH<sub>2</sub>-O), 3.38 (s, 3H, O-CH<sub>3</sub>), 2.70 (q, 2H, S-CH<sub>2</sub>).

PhthN(CH<sub>2</sub>CH<sub>2</sub>O)<sub>n</sub>CH<sub>3</sub> (*n* = ~17, **PhthN-PEG17**). Potassium phthalimide (3.28 g, 17.7 mmol) and **TsO-PEG17** (13.8 g, 14.8 mmol) were dissolved in DMF (50 ml) and the solution was stirred at 60 °C under N<sub>2</sub>. After 24 h, the reaction mixture was treated with water / dichloromethane, and the organic layer separated was washed twice with water, dried over MgSO<sub>4</sub> and filtered. The residue after evaporation was subjected to silica gel column chromatography with dichloromethane / methanol (10 / 1 v/v) as eluent to give PhthN-PEG17 as yellow oil (12.5 g, 93 %). <sup>1</sup>H NMR: δ 7.84 (d, 2H, Ar-H), 7.73 (d, 2H, Ar-H), 3.90-3.40 (m, 68H, O-CH<sub>2</sub>-CH<sub>2</sub>-O), 3.37 (s, 3H, O-CH<sub>3</sub>).

H<sub>2</sub>N(CH<sub>2</sub>CH<sub>2</sub>O)<sub>n</sub>CH<sub>3</sub> (*n* = ~17, **H<sub>2</sub>N-PEG17**): **PhthN-PEG17** (12.5 g, 13.7 mmol) was mixed with 40% aqueous methylamine (60.0 ml, 549.4 mmol) and the mixture was stirred at room temperature. After 24 h, water and dichloromethane were added to the reaction mixture. To the organic layer separated was added aq. HCl (1.0 M) until the pH of the aqueous layer reached to 2 – 3. The aqueous layer was treated with aq. NaOH (1.0 M) until the pH reached 12 – 14. The resulting alkaline solution was extracted with dichloromethane and the organic layer was collected. After drying over Na<sub>2</sub>SO<sub>4</sub> and filtration, the filtrate was evaporated to give **H<sub>2</sub>N-PEG17** as transparent oil (7.27 g, 68 %). <sup>1</sup>H NMR: δ 3.90-3.40 (m, 66H, O-CH<sub>2</sub>-CH<sub>2</sub>-O), 3.38 (s, 3H, O-CH<sub>3</sub>), 2.86 (t, 2H, N-CH<sub>2</sub>).

HS(CH<sub>2</sub>)<sub>2</sub>CONH(CH<sub>2</sub>CH<sub>2</sub>O)<sub>n</sub>CH<sub>3</sub> (*n* = ~17, **HS-C2-PEG17**): To a dichloromethane solution (30 mL) containing 3,3-dithiodipropionic acid (0.14 g, 0.64 mmol), 1-ethyl-3-(3-dimethylaminopropyl)carbodiimide hydrochloride (0.37 g, 1.93 mmol) and 1-hydroxybenzotriazole (0.04 g, 0.26 mmol) was added **H<sub>2</sub>N-PEG17** (1.50 g, 1.92 mmol) at 0 °C, and the mixture was stirred at room temperature under N<sub>2</sub>. After 24 h, the reaction mixture was treated with aq. HCl (1.0 M) and the separated organic layer was washed with aq. NaHCO<sub>3</sub> then with water, dried over MgSO<sub>4</sub>, and filtrated. The filtrate was evaporated and the residue was subjected to silica gel column chromatography with dichloromethane / methanol (10 / 1 v/v) as eluent. The final fraction gave disulfide (S(CH<sub>2</sub>)<sub>2</sub>CONH-PEG17)<sub>2</sub> as transparent oil (1.03 g, 93 %), which was used in the next reaction without further purification. The disulfide thus obtained was dissolved in THF / EtOH (15 mL each) and to this solution NaBH<sub>4</sub> (1.18 g, 29.5 mol) was slowly added. After the resultant solution was stirred at room temperature for 6 h, the solvents were removed in vacuo, and the residue was treated with aq. HCl (1.0 M) to have pH of 2~3. The resultant suspension was extracted with dichloromethane, and then the organic layer was separated. After drying over Na<sub>2</sub>SO<sub>4</sub> and filtration, the organic layer was evaporated to give **HS-C2-PEG17** as transparent oil (0.95 g, 93 %). <sup>1</sup>H NMR: δ 6.56 (s, 1H, N-H), 3.90-3.40 (m, 68H, O-CH<sub>2</sub>-CH<sub>2</sub>-O), 3.38 (s, 3H, O-CH<sub>3</sub>), 2.81 (q, 2H, S-CH<sub>2</sub>), 2.51 (t, 2H, CH<sub>2</sub>-CO).

HS(CH<sub>2</sub>)<sub>3</sub>CONH(CH<sub>2</sub>CH<sub>2</sub>O)<sub>n</sub>CH<sub>3</sub> ( $n = \sim 17$ , **HS-C3-PEG17**) was prepared in a similar manner to that described for the synthesis of **HS-C2-PEG17**. <sup>1</sup>H NMR:  $\delta$  6.28 (s, 1H, N-H), 3.90-3.40 (m, 68H, O-CH<sub>2</sub>-CH<sub>2</sub>-O), 3.37 (s, 3H, O-CH<sub>3</sub>), 2.58 (q, 2H, S-CH<sub>2</sub>), 2.32 (t, 2H, CH<sub>2</sub>-CO), 1.94 (q, 2H, C-CH<sub>2</sub>-C).

HS(CH<sub>2</sub>)<sub>7</sub>CONH(CH<sub>2</sub>CH<sub>2</sub>O)<sub>n</sub>CH<sub>3</sub> ( $n = \sim 17$ , **HS-C7-PEG17**) and HS(CH<sub>2</sub>)<sub>10</sub>CONH(CH<sub>2</sub>CH<sub>2</sub>O)<sub>n</sub>CH<sub>3</sub> ( $n = \sim 17$ , **HS-C10-PEG17**) were prepared by the condensation of H<sub>2</sub>N-PEG17 with 8-mercaptooctanoic acid and 11-mercaptoundecanoic acid, respectively, in similar manners to that described for the synthesis of **HS-C2-PEG17**.

**HS-C7-PEG17**: <sup>1</sup>H NMR:  $\delta$  6.07 (s, 1H, N-H), 3.90-3.40 (m, 68H, O-CH<sub>2</sub>-CH<sub>2</sub>-O), 3.38 (s, 3H, O-CH<sub>3</sub>), 2.51 (q, 2H, S-CH<sub>2</sub>), 2.17 (t, 2H, CH<sub>2</sub>-CO), 1.80-1.20 (m, 10H, C-CH<sub>2</sub>-C).

**HS-C10-PEG17**: <sup>1</sup>H NMR:  $\delta$  6.26 (s, 1H, N-H), 3.90-3.40 (m, 68H, O-CH<sub>2</sub>-CH<sub>2</sub>-O), 3.38 (s, 3H, O-CH<sub>3</sub>), 2.52 (q, 2H, S-CH<sub>2</sub>), 2.17 (t, 2H, CH<sub>2</sub>-CO), 1.90-1.20 (m, 16H, C-CH<sub>2</sub>-C).

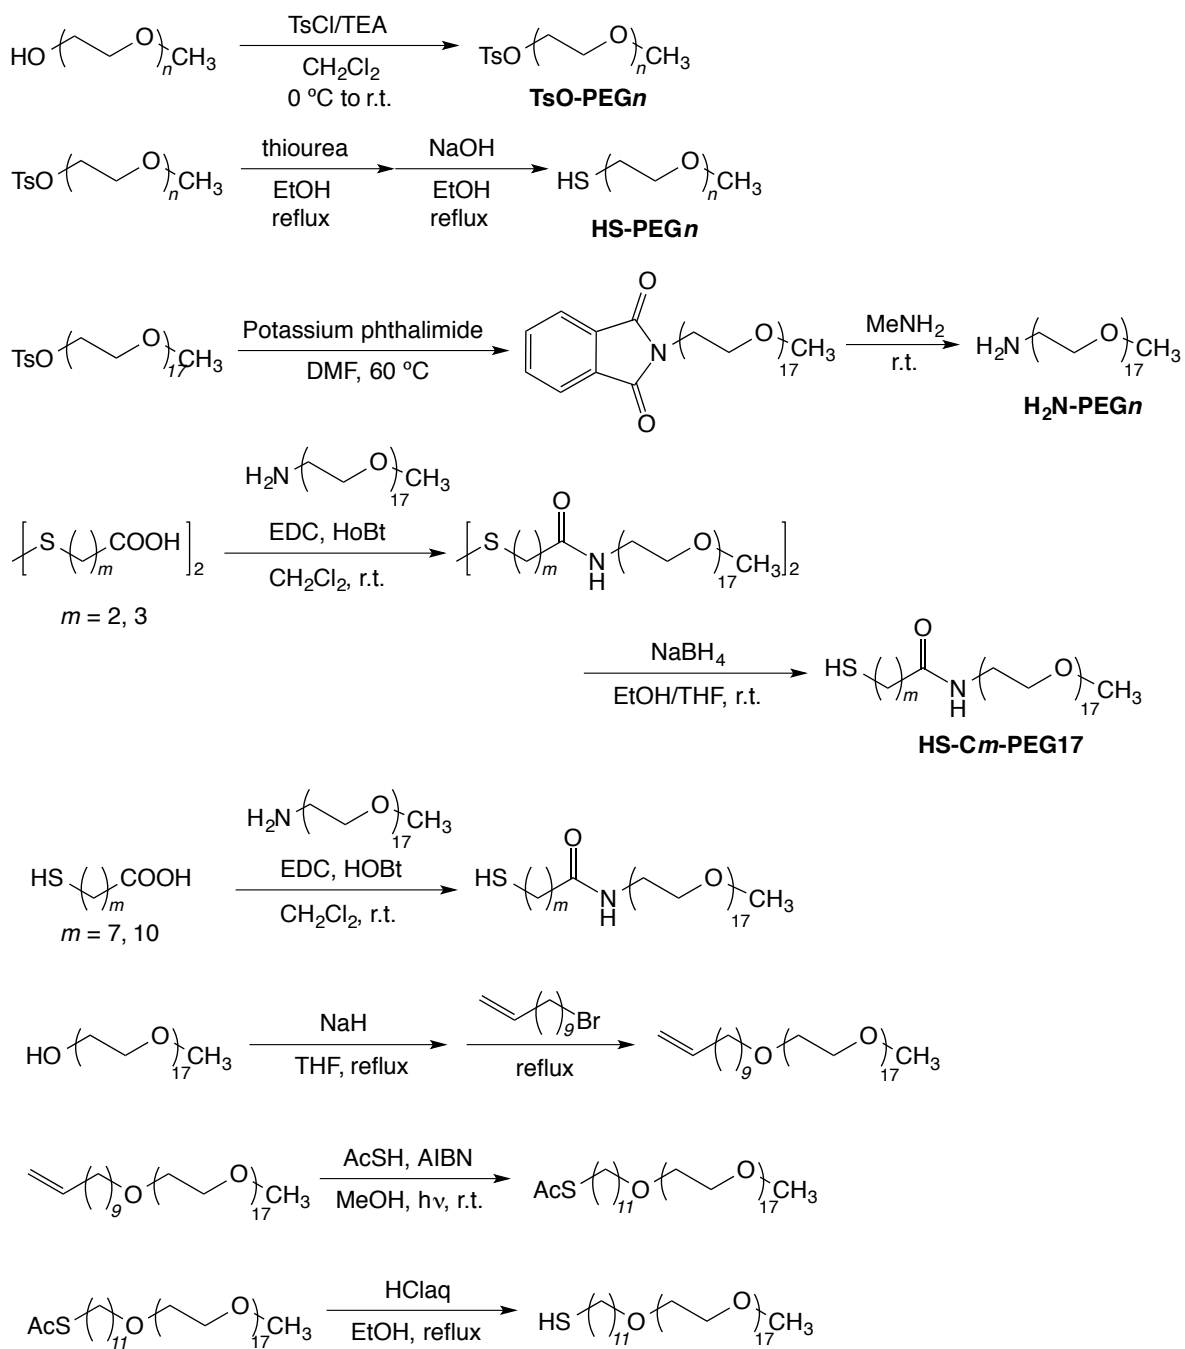

**Scheme S1. Syntheses of PEGylated thiols.**

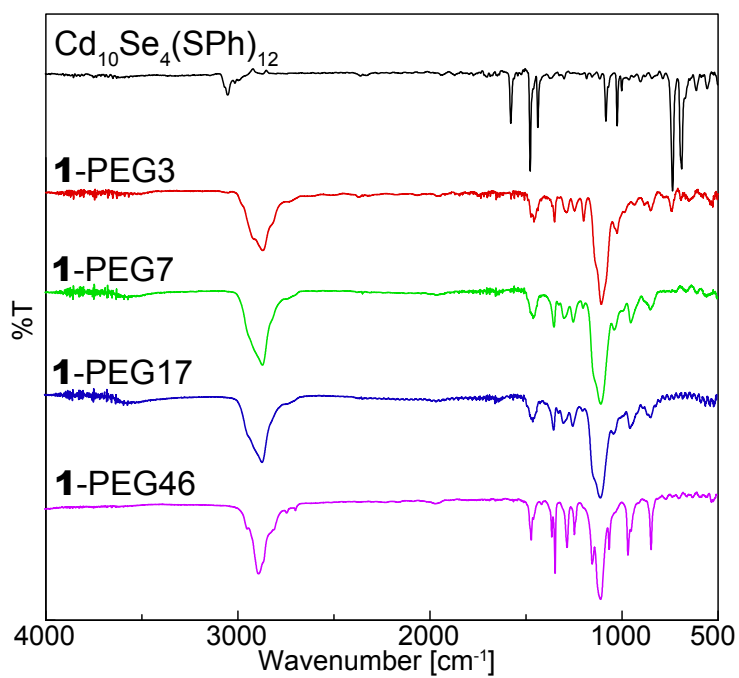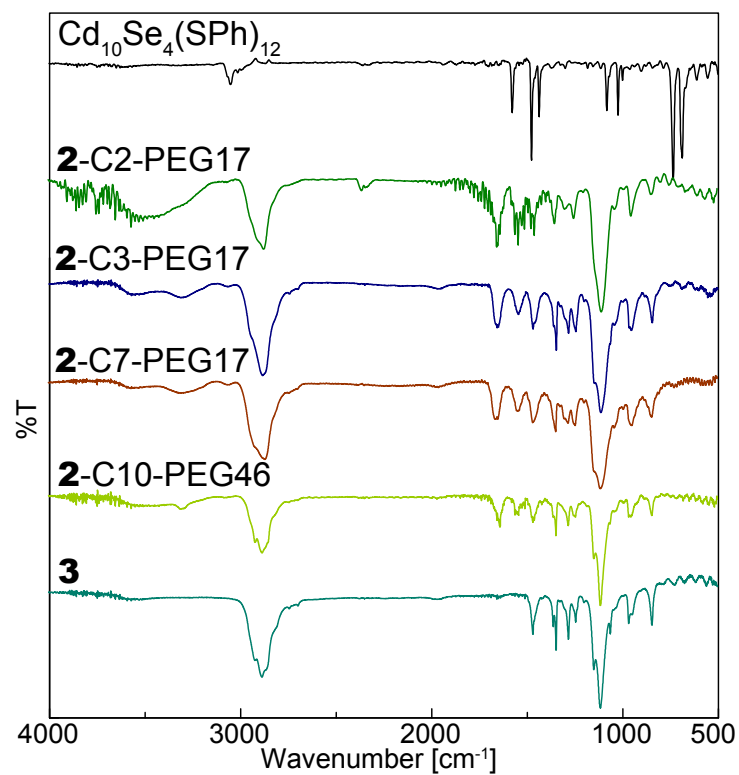

Fig. S1 FT-IR spectra in KBr pellets.

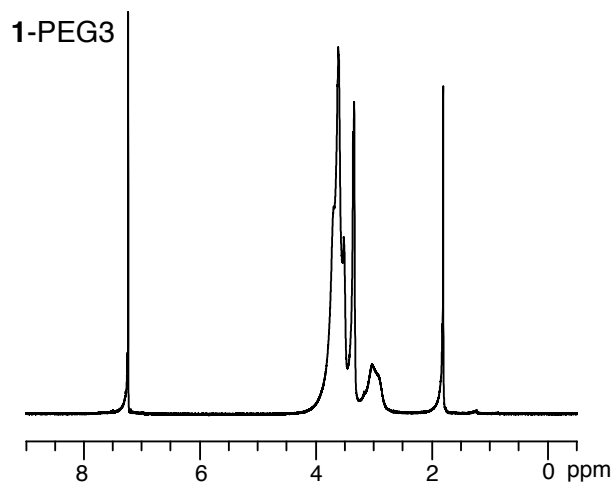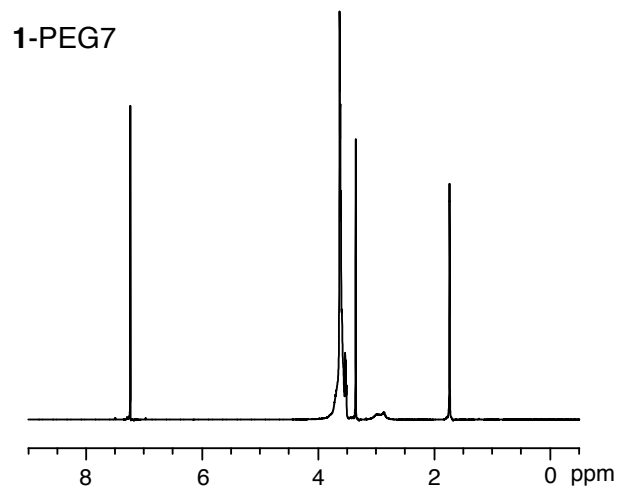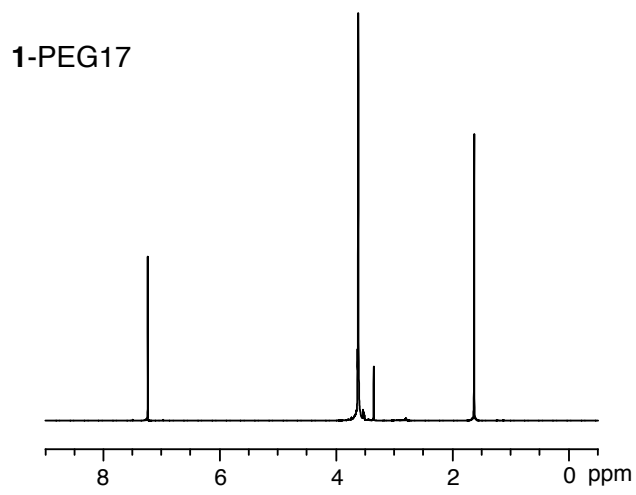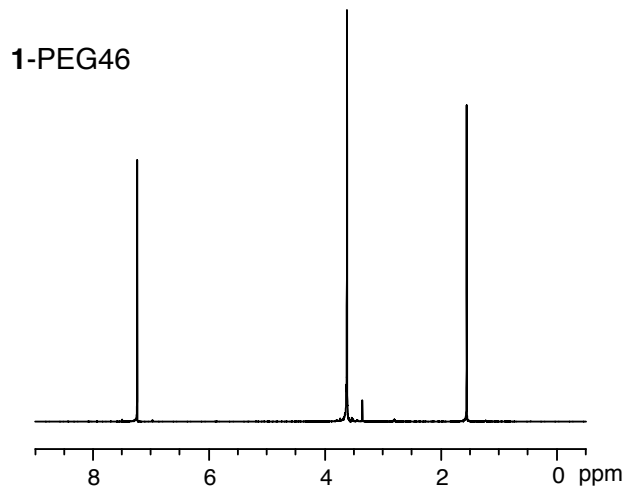

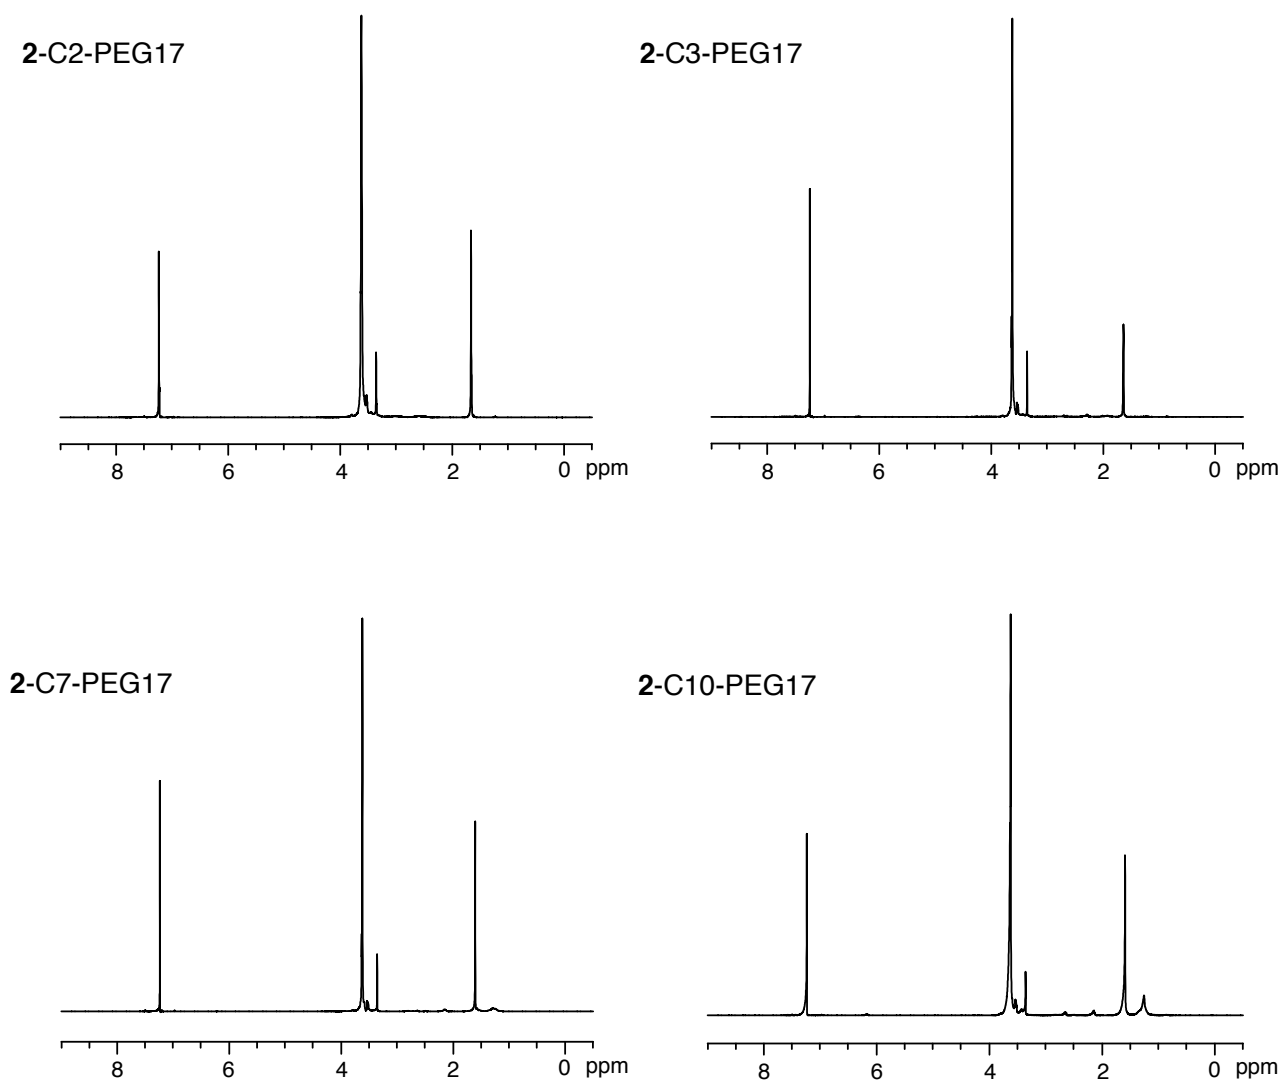

**Fig. S2**  $^1\text{H}$  NMR spectra in  $\text{CDCl}_3$ , r.t..

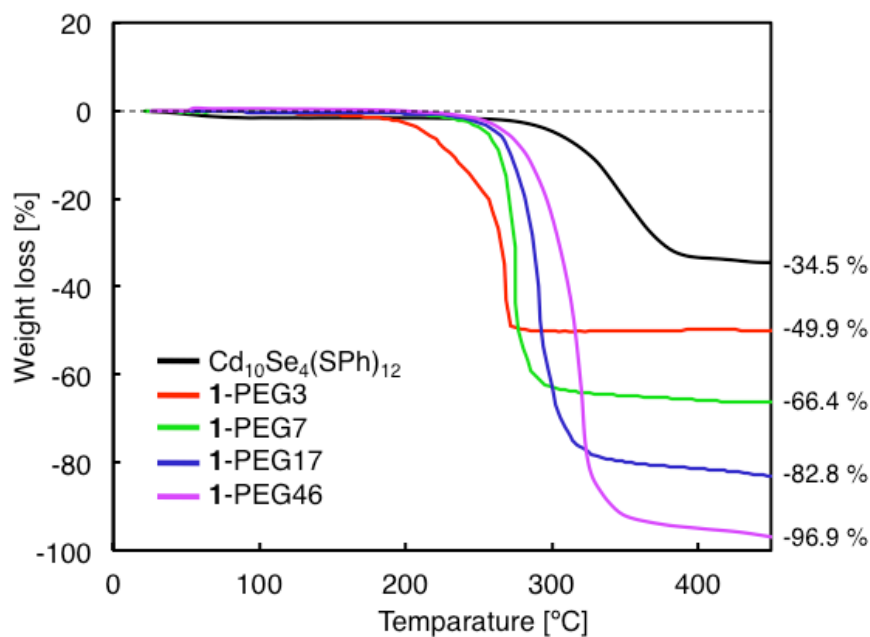

**Fig. S3** Thermogravimetric (TG) profiles of  $\text{Cd}_{10}\text{Se}_4(\text{SPh})_{12}$  and **1-PEG $n$**  ( $n = 3, 7, 17$  and  $46$ ).

**Table S1** Calculated and observed weight losses of  $\text{Cd}_{10}\text{Se}_4(\text{SR})_{12}$  clusters upon heated to  $450\text{ }^\circ\text{C}$  assuming the loss of organic moieties.

|                                              | Obsd. weight loss<br>[%] | Calcd. weight loss<br>[%] |
|----------------------------------------------|--------------------------|---------------------------|
| $\text{Cd}_{10}\text{Se}_4(\text{SPh})_{12}$ | -34.5                    | -33.7                     |
| <b>1-PEG3</b>                                | -49.9                    | -49.2                     |
| <b>1-PEG7</b>                                | -66.4                    | -68.0                     |
| <b>1-PEG17</b>                               | -82.8                    | -83.2                     |
| <b>1-PEG46</b>                               | -96.9                    | -93.1                     |
| <b>2-C2-PEG17</b>                            | -87.3                    | -84.6                     |
| <b>2-C3-PEG17</b>                            | -83.7                    | -84.8                     |
| <b>2-C7-PEG17</b>                            | -89.6                    | -85.6                     |
| <b>2-C10-PEG17</b>                           | -87.4                    | -86.1                     |



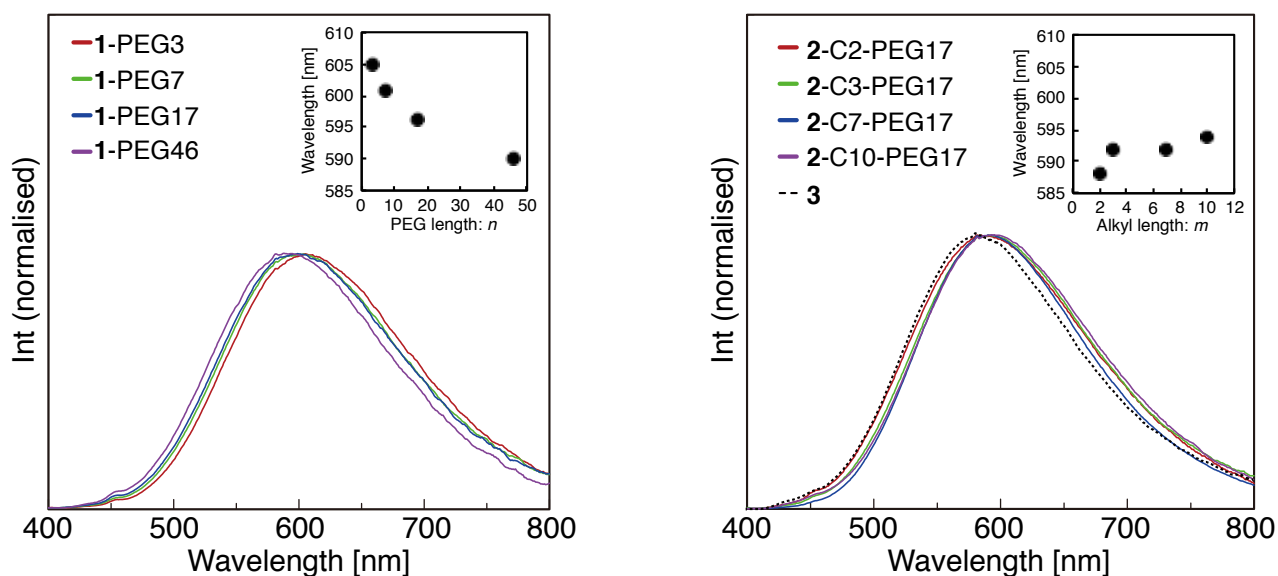

**Fig. S4** Corrected photoluminescence emission (PL) spectra ( $\lambda_{\text{ex}} = 393 \text{ nm}$ ) of **1** - **3** in water at  $20 \text{ }^\circ\text{C}$ . The intensities are normalised at the band maxima. Insets represent the plots of the wavelengths of the maxima versus PEG-chain length of **1** (a) and versus the alkyl-chain length of **2** (b).

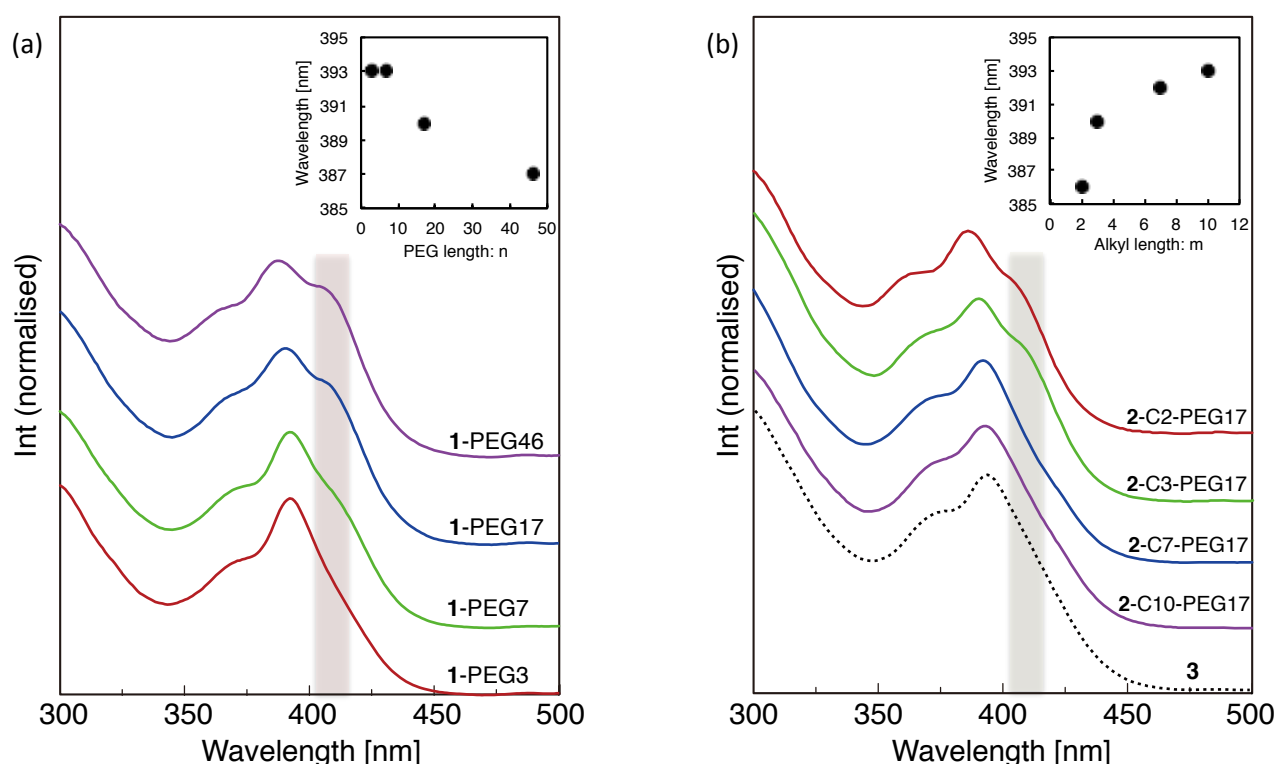

**Fig. S5** Corrected photoluminescence excitation (PLE) spectra (monitored at  $580 \text{ nm}$ ) of **1** - **3** in water at  $20 \text{ }^\circ\text{C}$ . The intensities are normalised at the band maxima at  $\sim 390 \text{ nm}$ . Insets represent the plots of the wavelengths of the maxima versus PEG-chain length of **1** (a) and versus the alkyl-chain length of **2** (b).

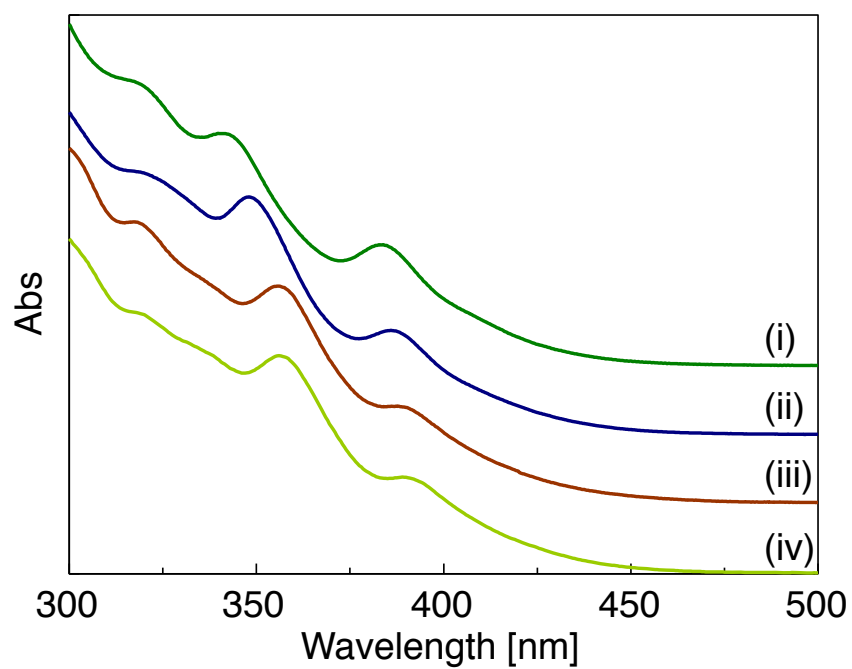

**Fig. S6** Absorption spectra of (i) 2-C2-PEG17, (ii) 2-C3-PEG17, (iii) 2-C7-PEG17, (iv) 2-C10-PEG17, and **3** in water at 20 °C.

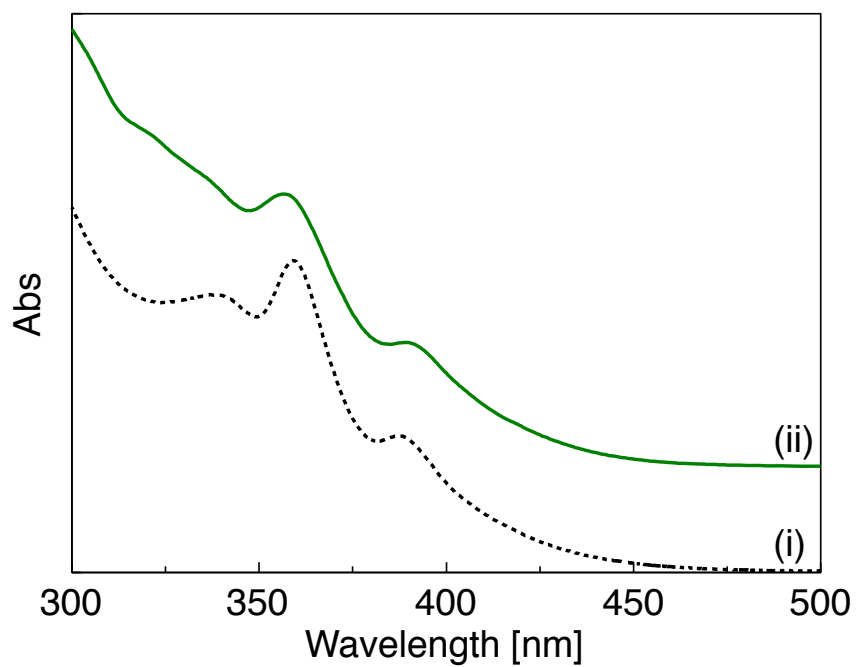

**Fig. S7** Absorption spectra of (i) 1-PEG3 and (ii) **3** in water at 20 °C.

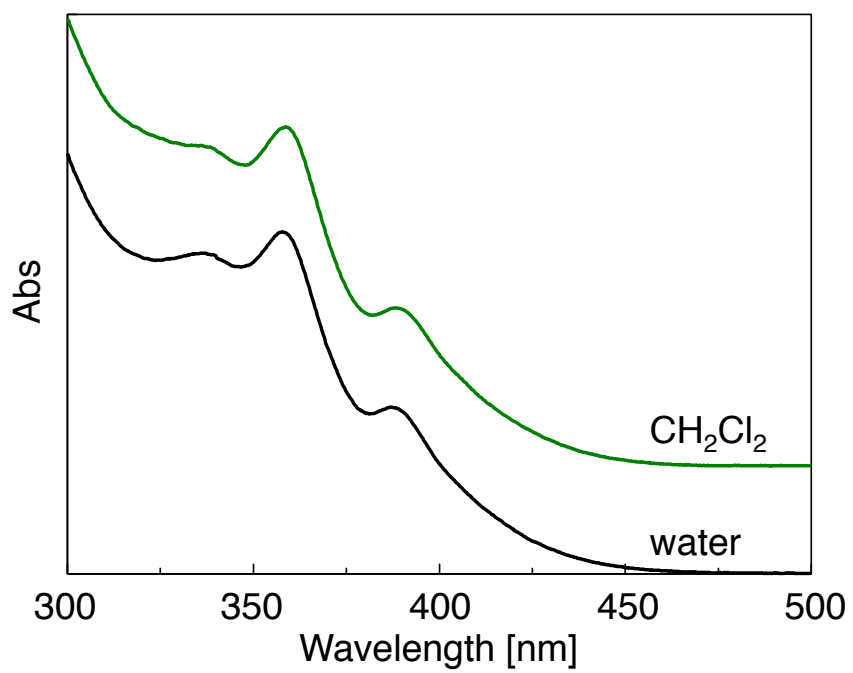

**Fig. S8** Absorption spectra of 1-PEG3 in water and CH<sub>2</sub>Cl<sub>2</sub> at 20°C.

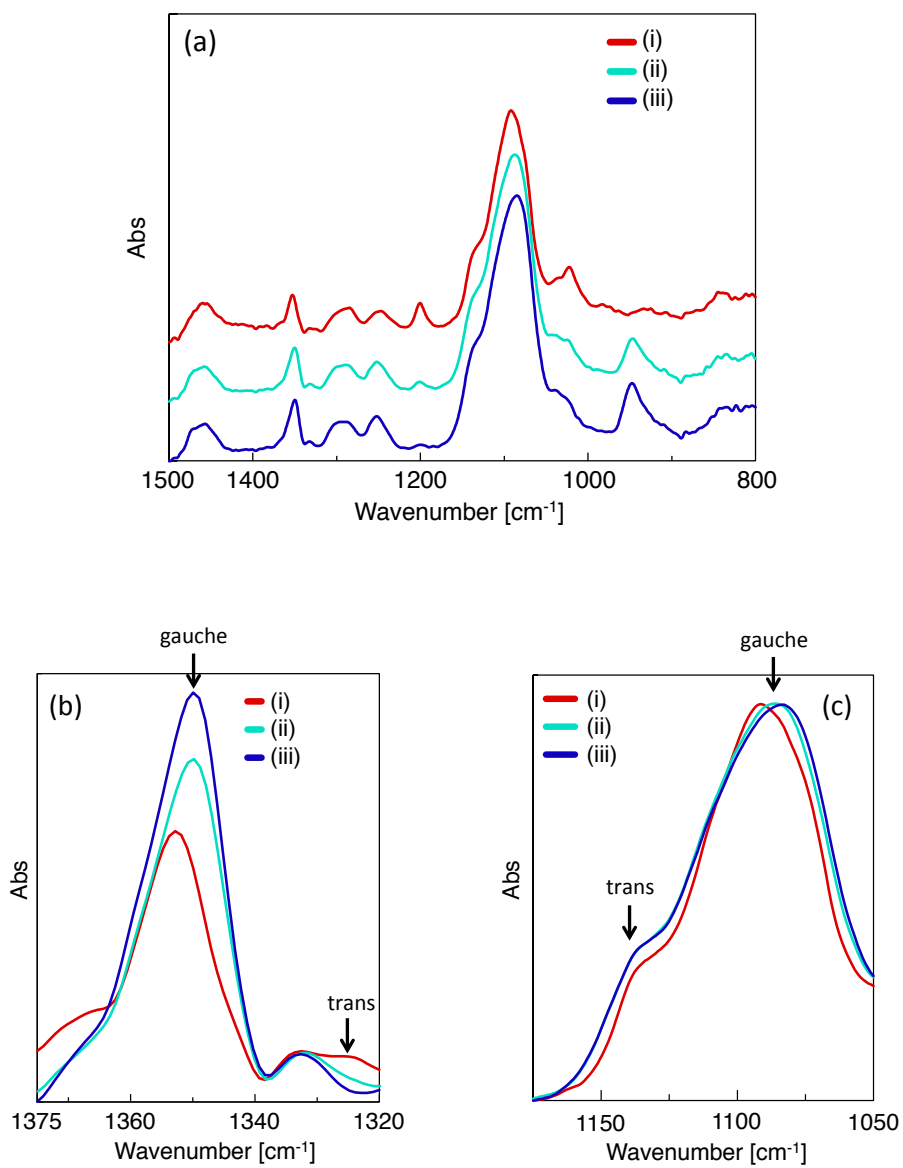

**Fig. S9** ATR-IR spectra of (i) 1-PEG3, (ii) 1-PEG7 and (iii) 1-PEG17 in water.
